# Supplementary material
Source: publisher site journal article supplement (https://www.dovepress.com/article/supplementary_file/530823/530823%20Revised%20Supplementary%20Material.docx)
Supplement: Supplementary file 1 [file 530823%20Revised%20Supplementary%20Material.docx]

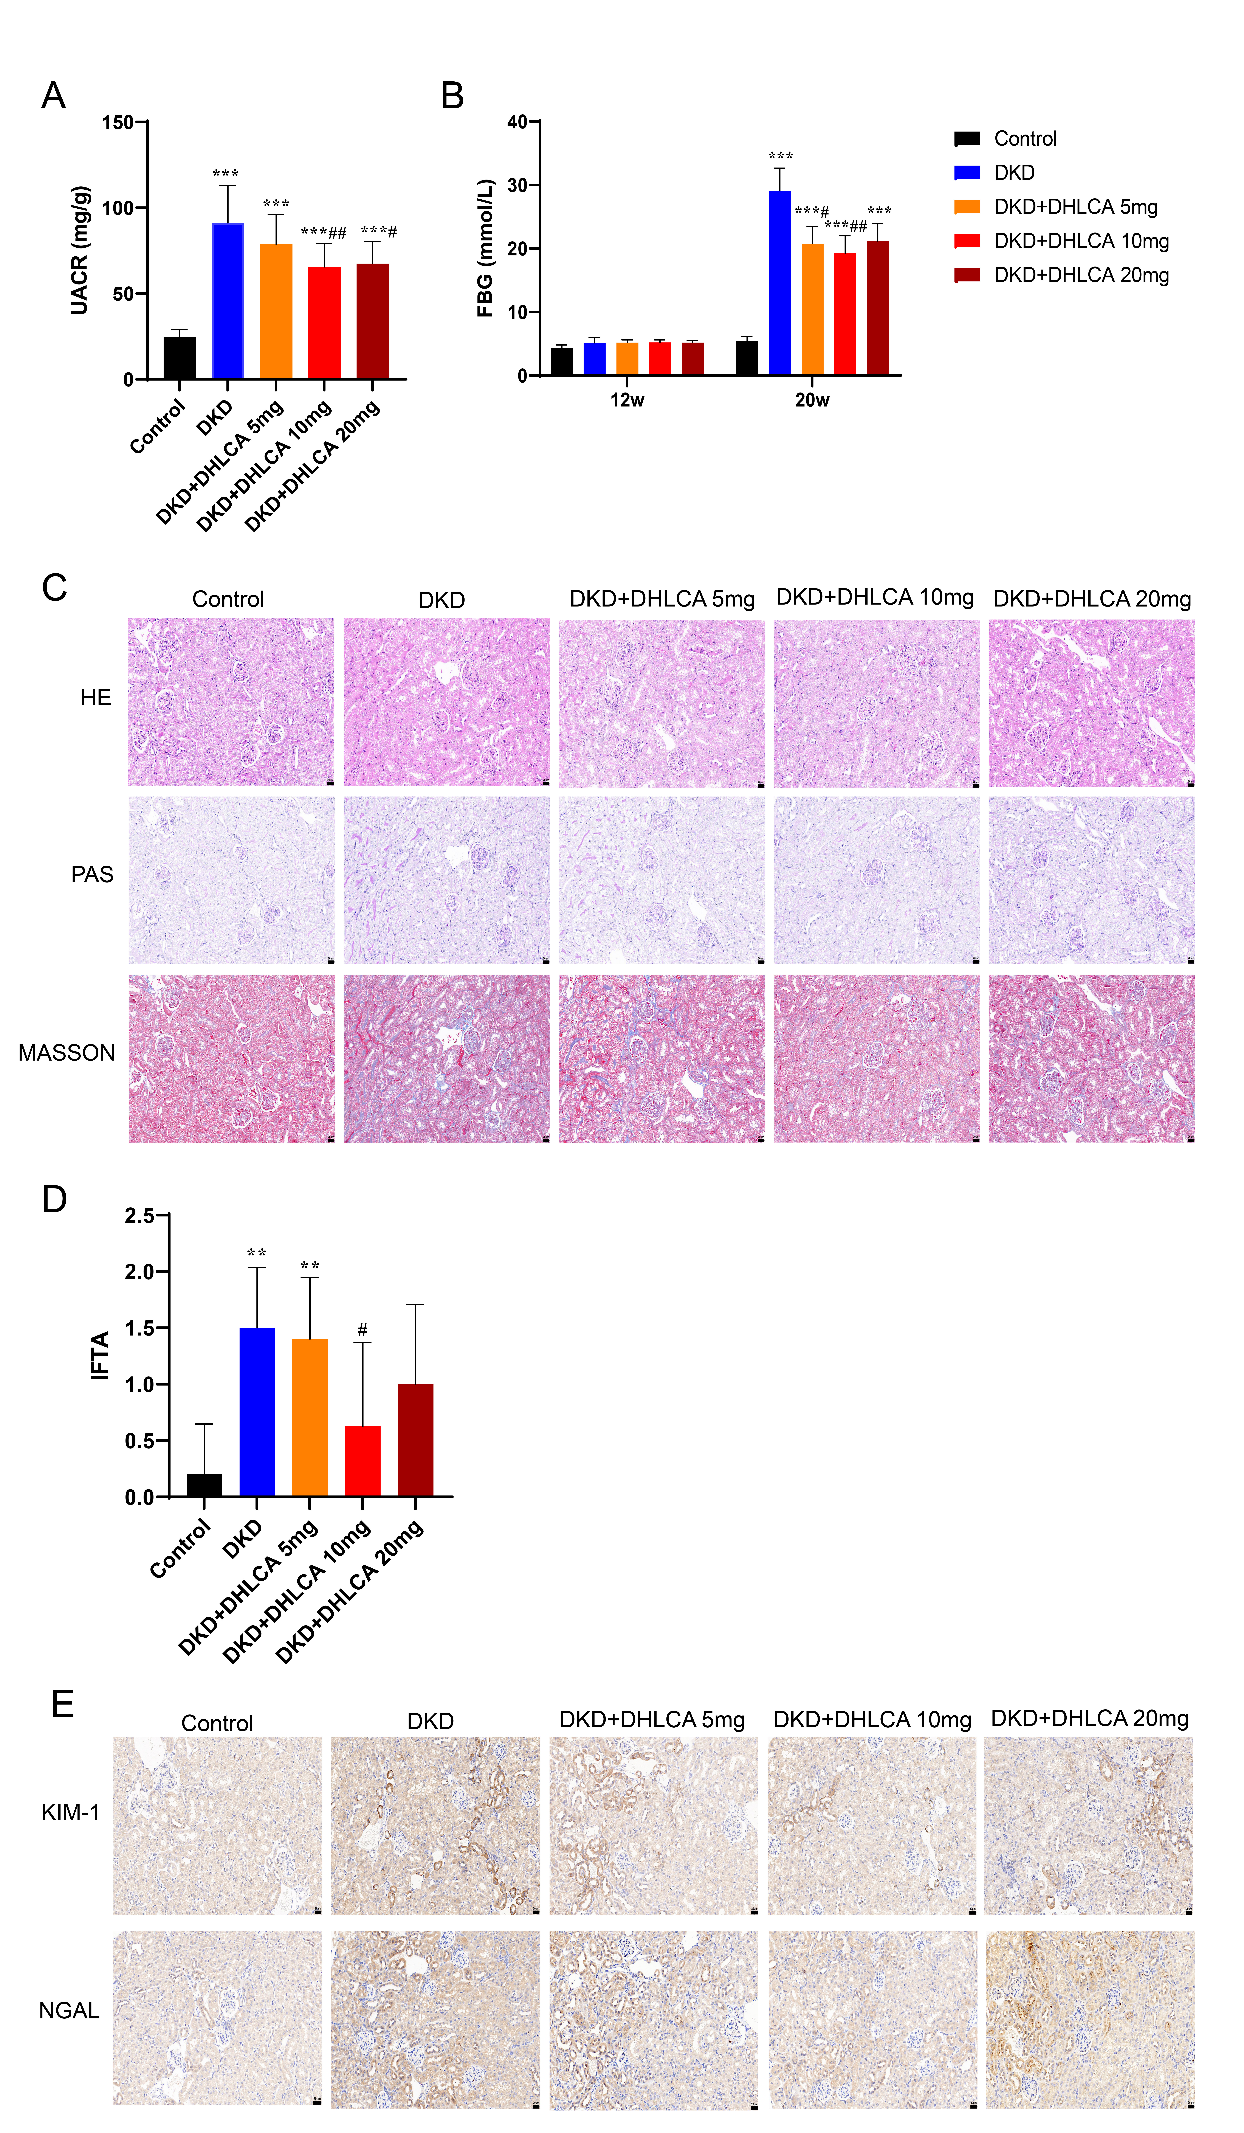


**Figure S1. Different dose of DHLCA in DKD mice.** (A) UACR. (B) FBG. (C) Morphological examinations of renal pathology by HE, PAS, Masson staining (Magnification 40×, Control group: n = 5, DKD group: n = 8, DKD+DHLCA 5mg group: n = 5, DKD+DHLCA 10mg group: n = 8, DKD+DHLCA 20mg group: n = 5). (D) Quantification of IFTA score of the kidneys in each group (Magnification 40×, Control group: n = 5, DKD group: n = 8, DKD+DHLCA 5mg group: n = 5, DKD+DHLCA 10mg group: n = 8, DKD+DHLCA 20mg group: n = 5). (E) Immunohistochemistry staining for KIM-1 and NGAL (Magnification 40×, Control group: n = 5, DKD group: n = 8, DKD+DHLCA 5mg group: n = 5, DKD+DHLCA 10mg group: n = 8, DKD+DHLCA 20mg group: n = 5). ***P* < 0.01 (compared to Control group); ****P* < 0.001 (compared to Control group); #*P* < 0.05 (compared to DKD group); ##*P* < 0.01 (compared to DKD group).


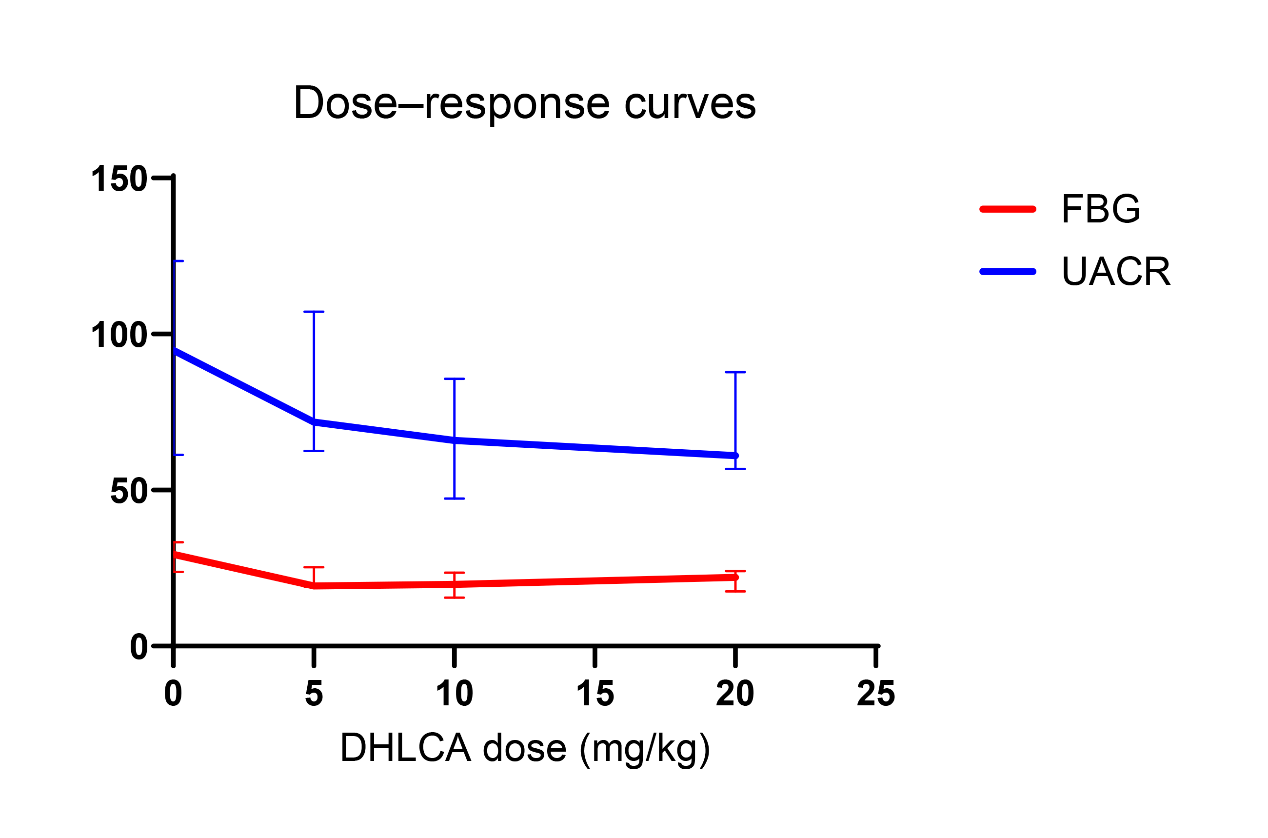


**Figure S2. Dose–response curves for FBG and UACR.**

| **Table S1.** Partial Spearman correlations between clinical indicators and BAs. | | | | | | |
| --- | --- | --- | --- | --- | --- | --- |
| **Clinical indicators** | **Bile Acids** | **ρ** | **CI_Lower** | **CI_Upper** | ***P*_value** | **FDR_q** |
| ALT | NCA | 0.16241378 | -0.06651453 | 0.371229036 | 0.121909518 | 0.270637958 |
| ALT | CA | 0.119302906 | -0.092872681 | 0.32248162 | 0.257332512 | 0.430196301 |
| ALT | GCDCA_3S | 0.343228372 | 0.160234726 | 0.495432517 | 0.00080963 | 0.00833806 |
| ALT | CDCA_3Gln | 0.391506562 | 0.208518573 | 0.53601888 | 0.000113809 | 0.001934759 |
| ALT | GCDCA_3Gln | 0.393125903 | 0.193891106 | 0.517210189 | 0.000105983 | 0.001934759 |
| ALT | DHLCA | 0.064851638 | -0.107564528 | 0.284813271 | 0.539098215 | 0.701819994 |
| ALT | LCA | -0.047475496 | -0.228196813 | 0.1332585 | 0.653145723 | 0.780954208 |
| ALT | DCA | -0.113116256 | -0.303812355 | 0.084414391 | 0.283007071 | 0.44754504 |
| ALT | 3DHCA | 0.112698222 | -0.089489575 | 0.291348496 | 0.284801389 | 0.44754504 |
| ALT | GLCA | -0.000882408 | -0.181861273 | 0.214455068 | 0.993339303 | 0.998399302 |
| ALT | TLCA | 0.042850152 | -0.184153495 | 0.214692807 | 0.685057792 | 0.805696901 |
| AST | NCA | 0.203405115 | -0.052322164 | 0.365144683 | 0.05181113 | 0.164999374 |
| AST | CA | 0.15817103 | -0.06185119 | 0.35272469 | 0.132098786 | 0.278877345 |
| AST | GCDCA_3S | 0.399058212 | 0.203261556 | 0.56363871 | 8.13792E-05 | 0.001934759 |
| AST | CDCA_3Gln | 0.417032756 | 0.212600283 | 0.588816759 | 3.54327E-05 | 0.001186207 |
| AST | GCDCA_3Gln | 0.474060432 | 0.331397899 | 0.611602285 | 1.81163E-06 | 0.000318516 |
| AST | DHLCA | 0.115873163 | -0.076830366 | 0.330667823 | 0.271362533 | 0.434370524 |
| AST | LCA | -0.11840975 | -0.290557384 | 0.102289289 | 0.260937543 | 0.431816997 |
| AST | DCA | -0.192842588 | -0.376230887 | -0.003965101 | 0.065516276 | 0.182956542 |
| AST | 3DHCA | 0.200916196 | 0.014834924 | 0.391242776 | 0.054807002 | 0.170815156 |
| AST | GLCA | -0.040088787 | -0.255133664 | 0.182641947 | 0.704380953 | 0.818131914 |
| AST | TLCA | 0.093290326 | -0.133779297 | 0.306674399 | 0.376423139 | 0.541470207 |
| GGT | NCA | 0.299242001 | 0.118058835 | 0.483929374 | 0.00375915 | 0.021967535 |
| GGT | CA | 0.223053006 | 0.008289349 | 0.398158255 | 0.032581629 | 0.119465972 |
| GGT | GCDCA_3S | 0.291804265 | 0.133650319 | 0.470514797 | 0.004767746 | 0.024765791 |
| GGT | CDCA_3Gln | 0.452477198 | 0.296900165 | 0.596324024 | 5.94687E-06 | 0.000370688 |
| GGT | GCDCA_3Gln | 0.36335612 | 0.147501188 | 0.536281935 | 0.00037081 | 0.004952964 |
| GGT | DHLCA | -0.029692974 | -0.225951189 | 0.191161422 | 0.778731179 | 0.861672961 |
| GGT | LCA | -0.129286095 | -0.315228808 | 0.069329852 | 0.21934335 | 0.387496765 |
| GGT | DCA | -0.159510845 | -0.328779292 | 0.061315764 | 0.128813377 | 0.278877345 |
| GGT | 3DHCA | 0.235784072 | 0.032079859 | 0.41272208 | 0.023657755 | 0.096173918 |
| GGT | GLCA | -0.024982081 | -0.224160963 | 0.192087102 | 0.813137545 | 0.888864854 |
| GGT | TLCA | -0.206425483 | -0.371897061 | -0.003204677 | 0.048357839 | 0.158647647 |
| ALP | NCA | 0.177047363 | -0.032636193 | 0.374346038 | 0.091348735 | 0.214677973 |
| ALP | CA | -0.100009598 | -0.288877935 | 0.133325513 | 0.342863006 | 0.50885224 |
| ALP | GCDCA_3S | 0.321775166 | 0.153062838 | 0.523258005 | 0.00176126 | 0.012198358 |
| ALP | CDCA_3Gln | 0.179651131 | 0.001840429 | 0.350606184 | 0.086608781 | 0.207639002 |
| ALP | GCDCA_3Gln | 0.154722497 | -0.079623828 | 0.347744197 | 0.140848423 | 0.289435771 |
| ALP | DHLCA | -0.094852109 | -0.283371745 | 0.089970975 | 0.368450184 | 0.534109956 |
| ALP | LCA | 0.034972991 | -0.172672096 | 0.230342957 | 0.740671731 | 0.839934672 |
| ALP | DCA | -0.003147116 | -0.200366673 | 0.196794643 | 0.976247756 | 0.991408128 |
| ALP | 3DHCA | -0.038146428 | -0.236834402 | 0.1806401 | 0.718087136 | 0.823817757 |
| ALP | GLCA | -0.023510096 | -0.242843553 | 0.205243711 | 0.823964794 | 0.890644026 |
| ALP | TLCA | -0.117573377 | -0.303526151 | 0.076483871 | 0.264344376 | 0.433617529 |
| LDH | NCA | 0.327652786 | 0.118395279 | 0.530069809 | 0.001431307 | 0.011152264 |
| LDH | CA | 0.062779603 | -0.144632211 | 0.252295207 | 0.55216801 | 0.707228889 |
| LDH | GCDCA_3S | 0.310189755 | 0.082070382 | 0.514198205 | 0.002619786 | 0.016329999 |
| LDH | CDCA_3Gln | 0.352757334 | 0.145857927 | 0.502437286 | 0.000563003 | 0.007018772 |
| LDH | GCDCA_3Gln | 0.288434936 | 0.108423279 | 0.47572313 | 0.005299121 | 0.026077256 |
| LDH | DHLCA | -0.077218351 | -0.265642802 | 0.13569685 | 0.464401084 | 0.641189049 |
| LDH | LCA | -0.151968826 | -0.296083934 | 0.088390836 | 0.148144136 | 0.294090795 |
| LDH | DCA | -0.144033564 | -0.328566959 | 0.075388213 | 0.170753559 | 0.325825669 |
| LDH | 3DHCA | 0.050367599 | -0.1661993 | 0.262422545 | 0.633499937 | 0.779371634 |
| LDH | GLCA | 0.052256551 | -0.175612104 | 0.240234565 | 0.620803187 | 0.77393464 |
| LDH | TLCA | -0.190017767 | -0.380716726 | 0.005037103 | 0.069641669 | 0.182956542 |
| TBA | NCA | 0.462777115 | 0.251551175 | 0.642710062 | 3.40659E-06 | 0.000318516 |
| TBA | CA | 0.389513557 | 0.175914826 | 0.541952343 | 0.000124177 | 0.001935085 |
| TBA | GCDCA_3S | 0.323322215 | 0.11397034 | 0.525899151 | 0.001668332 | 0.011999158 |
| TBA | CDCA_3Gln | 0.310912165 | 0.135837633 | 0.498712262 | 0.002556877 | 0.016329999 |
| TBA | GCDCA_3Gln | 0.395384606 | 0.205134594 | 0.553294226 | 9.58985E-05 | 0.001934759 |
| TBA | DHLCA | 0.244898905 | 0.067162056 | 0.415073692 | 0.01863168 | 0.079184642 |
| TBA | LCA | 0.142899012 | -0.043187035 | 0.323224897 | 0.174183333 | 0.329012963 |
| TBA | DCA | 0.080634055 | -0.093741898 | 0.259033841 | 0.444816335 | 0.625418456 |
| TBA | 3DHCA | 0.396555254 | 0.219355225 | 0.55489918 | 9.10295E-05 | 0.001934759 |
| TBA | GLCA | 0.314293317 | 0.146052901 | 0.508319765 | 0.002280122 | 0.015227955 |
| TBA | TLCA | 0.342017941 | 0.154108705 | 0.505872846 | 0.000847183 | 0.00833806 |
| ALB | NCA | -0.060215195 | -0.271548534 | 0.16485856 | 0.568552362 | 0.723260488 |
| ALB | CA | 0.137170871 | -0.058345928 | 0.336836061 | 0.192274292 | 0.355992997 |
| ALB | GCDCA_3S | -0.187938344 | -0.359586501 | 0.054496236 | 0.072810484 | 0.182956542 |
| ALB | CDCA_3Gln | 0.076610635 | -0.132820398 | 0.302696468 | 0.467934334 | 0.641189049 |
| ALB | GCDCA_3Gln | 0.003969156 | -0.227509328 | 0.195643931 | 0.970046138 | 0.991408128 |
| ALB | DHLCA | 0.176783209 | -0.043078632 | 0.379188989 | 0.091840844 | 0.214677973 |
| ALB | LCA | 0.042159364 | -0.190822716 | 0.251894244 | 0.689873324 | 0.806289448 |
| ALB | DCA | 0.044957512 | -0.184269274 | 0.219231527 | 0.670445483 | 0.793501932 |
| ALB | 3DHCA | 0.198091026 | 0.018146776 | 0.392640665 | 0.058378207 | 0.17359779 |
| ALB | GLCA | 0.302744199 | 0.093211034 | 0.520470261 | 0.003353976 | 0.020232047 |
| ALB | TLCA | 0.152324797 | -0.062131619 | 0.331226361 | 0.147185347 | 0.294090795 |
| TBIL | NCA | 0.151054434 | -0.064573834 | 0.315167476 | 0.150628498 | 0.294090795 |
| TBIL | CA | 0.128433608 | -0.054571549 | 0.357813712 | 0.222423541 | 0.388721516 |
| TBIL | GCDCA_3S | 0.191467882 | 0.003476675 | 0.377080162 | 0.067498459 | 0.182956542 |
| TBIL | CDCA_3Gln | 0.277716548 | 0.120375377 | 0.430254644 | 0.007355954 | 0.035270858 |
| TBIL | GCDCA_3Gln | 0.189440099 | 0.000483123 | 0.377884477 | 0.070510594 | 0.182956542 |
| TBIL | DHLCA | 0.227779363 | 0.041562982 | 0.415884757 | 0.028984087 | 0.108400485 |
| TBIL | LCA | -0.000212058 | -0.191943683 | 0.20834368 | 0.998399302 | 0.998399302 |
| TBIL | DCA | 0.012833771 | -0.184509824 | 0.23572259 | 0.903359071 | 0.943732661 |
| TBIL | 3DHCA | 0.198008884 | 0.018504282 | 0.381748524 | 0.058484817 | 0.17359779 |
| TBIL | GLCA | 0.150927037 | -0.0339411 | 0.337274551 | 0.150977093 | 0.294090795 |
| TBIL | TLCA | 0.229432509 | 0.059648691 | 0.417644047 | 0.027807849 | 0.106123833 |
| DBIL | NCA | 0.234004771 | -0.005619906 | 0.444973786 | 0.024763306 | 0.098526344 |
| DBIL | CA | 0.095027756 | -0.073729874 | 0.319054598 | 0.367560011 | 0.534109956 |
| DBIL | GCDCA_3S | 0.344871523 | 0.133251992 | 0.538390548 | 0.000761082 | 0.00833806 |
| DBIL | CDCA_3Gln | 0.334689261 | 0.120288488 | 0.482120074 | 0.001110523 | 0.009888942 |
| DBIL | GCDCA_3Gln | 0.290307835 | 0.037245464 | 0.467359953 | 0.004997597 | 0.025258125 |
| DBIL | DHLCA | 0.235968691 | 0.016982125 | 0.419255005 | 0.023545493 | 0.096173918 |
| DBIL | LCA | 0.024976374 | -0.179809142 | 0.249064011 | 0.81317946 | 0.888864854 |
| DBIL | DCA | 0.002710281 | -0.205098819 | 0.216928216 | 0.979543919 | 0.991408128 |
| DBIL | 3DHCA | 0.124909215 | -0.107173692 | 0.332325237 | 0.235480597 | 0.407730294 |
| DBIL | GLCA | 0.097495824 | -0.116446747 | 0.298716735 | 0.355191578 | 0.522998622 |
| DBIL | TLCA | 0.294698086 | 0.113568312 | 0.480423916 | 0.00434978 | 0.023240252 |
| IBIL | NCA | 0.048774002 | -0.173955844 | 0.226619124 | 0.644294788 | 0.780954208 |
| IBIL | CA | 0.120547371 | -0.11062723 | 0.284242032 | 0.252366392 | 0.429022867 |
| IBIL | GCDCA_3S | 0.064637964 | -0.118842419 | 0.23360126 | 0.540438926 | 0.701819994 |
| IBIL | CDCA_3Gln | 0.182595294 | -0.00608222 | 0.372700706 | 0.081486661 | 0.197896176 |
| IBIL | GCDCA_3Gln | 0.076299635 | -0.15560267 | 0.247129576 | 0.469748127 | 0.641189049 |
| IBIL | DHLCA | 0.19594376 | -0.025458871 | 0.394801108 | 0.06121776 | 0.178870644 |
| IBIL | LCA | 0.034910489 | -0.130232905 | 0.26934733 | 0.741118829 | 0.839934672 |
| IBIL | DCA | 0.070861251 | -0.141865068 | 0.282173367 | 0.502074811 | 0.665872267 |
| IBIL | 3DHCA | 0.189997762 | -0.001142641 | 0.366224305 | 0.069671614 | 0.182956542 |
| IBIL | GLCA | 0.211289213 | 0.011124043 | 0.422637501 | 0.043197798 | 0.146872515 |
| IBIL | TLCA | 0.187573472 | -0.011917066 | 0.424222989 | 0.073378292 | 0.182956542 |
| ADA | NCA | 0.298221072 | 0.096022013 | 0.493003643 | 0.003885225 | 0.022016273 |
| ADA | CA | -0.073303015 | -0.264150379 | 0.162087872 | 0.487419076 | 0.655736455 |
| ADA | GCDCA_3S | 0.428542255 | 0.267513047 | 0.575517081 | 2.02838E-05 | 0.000948266 |
| ADA | CDCA_3Gln | 0.221449768 | 0.020787063 | 0.401326624 | 0.03388437 | 0.121853409 |
| ADA | GCDCA_3Gln | 0.230677043 | 0.02815462 | 0.406943513 | 0.026949271 | 0.104989868 |
| ADA | DHLCA | -0.029933866 | -0.217911962 | 0.190834853 | 0.7769826 | 0.861672961 |
| ADA | LCA | 0.013883696 | -0.164797989 | 0.218594066 | 0.895495842 | 0.943360184 |
| ADA | DCA | -0.115774903 | -0.312976076 | 0.086793844 | 0.271771932 | 0.434370524 |
| ADA | 3DHCA | -0.147055121 | -0.359085201 | 0.067355906 | 0.161862332 | 0.312043877 |
| ADA | GLCA | 0.004189002 | -0.174256192 | 0.218069036 | 0.968387867 | 0.991408128 |
| ADA | TLCA | 0.106262116 | -0.048939908 | 0.321607885 | 0.313381187 | 0.48431638 |
| CHE | NCA | -0.05093308 | -0.282142389 | 0.175267367 | 0.629687644 | 0.779371634 |
| CHE | CA | 0.296478096 | 0.108684438 | 0.470594963 | 0.004109212 | 0.022600666 |
| CHE | GCDCA_3S | -0.244995781 | -0.410258466 | -0.05062176 | 0.018583628 | 0.079184642 |
| CHE | CDCA_3Gln | 0.074836721 | -0.110859922 | 0.255796375 | 0.478331079 | 0.648173274 |
| CHE | GCDCA_3Gln | -0.007336282 | -0.225416112 | 0.190496047 | 0.944666482 | 0.981403512 |
| CHE | DHLCA | -0.072414232 | -0.291762011 | 0.095929695 | 0.492727214 | 0.658142778 |
| CHE | LCA | -0.019398315 | -0.222462654 | 0.168244899 | 0.854377952 | 0.918210787 |
| CHE | DCA | 0.013554824 | -0.207360356 | 0.188220662 | 0.897957822 | 0.943360184 |
| CHE | 3DHCA | 0.3368757 | 0.123091654 | 0.538873802 | 0.001025074 | 0.009584446 |
| CHE | GLCA | 0.187751422 | -0.011881762 | 0.391128391 | 0.073100926 | 0.182956542 |
| CHE | TLCA | -0.031427735 | -0.216069058 | 0.143458547 | 0.766164069 | 0.857920245 |
| BUN | NCA | 0.129200689 | -0.058098997 | 0.342195629 | 0.219650573 | 0.387496765 |
| BUN | CA | 0.163901673 | -0.006594293 | 0.367269195 | 0.118483029 | 0.270199102 |
| BUN | GCDCA_3S | 0.049698488 | -0.201713184 | 0.270742741 | 0.638023255 | 0.779806201 |
| BUN | CDCA_3Gln | 0.102689976 | -0.093697343 | 0.286290519 | 0.330017485 | 0.501112279 |
| BUN | GCDCA_3Gln | 0.140109276 | -0.065347894 | 0.345518376 | 0.182831383 | 0.341894685 |
| BUN | DHLCA | 0.115987993 | -0.099662102 | 0.321214805 | 0.270884623 | 0.434370524 |
| BUN | LCA | 0.024379528 | -0.160610336 | 0.222056292 | 0.817565534 | 0.888864854 |
| BUN | DCA | 0.047106837 | -0.191351131 | 0.231177517 | 0.655667437 | 0.780954208 |
| BUN | 3DHCA | 0.161939649 | -0.046998916 | 0.357142058 | 0.123017254 | 0.270637958 |
| BUN | GLCA | -0.082502948 | -0.277313629 | 0.110053122 | 0.434299814 | 0.619954696 |
| BUN | TLCA | -0.033027629 | -0.219060176 | 0.180172086 | 0.754627273 | 0.850092169 |
| Scr | NCA | 0.119221997 | -0.094641754 | 0.344315934 | 0.257657677 | 0.430196301 |
| Scr | CA | 0.039190965 | -0.187493783 | 0.259236267 | 0.71070498 | 0.820381675 |
| Scr | GCDCA_3S | 0.152929712 | -0.097362962 | 0.32607419 | 0.145566752 | 0.294090795 |
| Scr | CDCA_3Gln | 0.104347831 | -0.110225695 | 0.305559099 | 0.322227776 | 0.493906509 |
| Scr | GCDCA_3Gln | 0.192632802 | -0.020941911 | 0.394982804 | 0.065815677 | 0.182956542 |
| Scr | DHLCA | -0.129892611 | -0.313701055 | 0.10830558 | 0.217170308 | 0.387496765 |
| Scr | LCA | -0.136110352 | -0.338938657 | 0.071278747 | 0.195767505 | 0.358907092 |
| Scr | DCA | -0.163137353 | -0.368513283 | 0.023850579 | 0.120233798 | 0.270637958 |
| Scr | 3DHCA | 0.016471006 | -0.21677562 | 0.210663651 | 0.87616322 | 0.930923421 |
| Scr | GLCA | -0.214879037 | -0.411935287 | -0.03889824 | 0.039689953 | 0.140038136 |
| Scr | TLCA | -0.017310962 | -0.251355256 | 0.192143349 | 0.869902018 | 0.929552442 |
| eGFR | NCA | -0.002543186 | -0.203416631 | 0.19907734 | 0.980804833 | 0.991408128 |
| eGFR | CA | 0.1899468 | -0.00595702 | 0.37779742 | 0.069747949 | 0.182956542 |
| eGFR | GCDCA_3S | -0.155426519 | -0.407513065 | 0.031769268 | 0.139027497 | 0.288868244 |
| eGFR | CDCA_3Gln | 0.080678162 | -0.128106372 | 0.29648593 | 0.444566507 | 0.625418456 |
| eGFR | GCDCA_3Gln | 0.059260515 | -0.118294361 | 0.291786564 | 0.57470976 | 0.726153548 |
| eGFR | DHLCA | 0.158646974 | -0.073531243 | 0.369751747 | 0.130924476 | 0.278877345 |
| eGFR | LCA | 0.063152465 | -0.119582062 | 0.254661814 | 0.549804863 | 0.707228889 |
| eGFR | DCA | 0.067203471 | -0.144039085 | 0.299371826 | 0.524450641 | 0.690649787 |
| eGFR | 3DHCA | 0.100268895 | -0.112183697 | 0.303094368 | 0.341606795 | 0.50885224 |
| eGFR | GLCA | 0.20319508 | -0.012350235 | 0.407948546 | 0.052058626 | 0.164999374 |
| eGFR | TLCA | 0.13347154 | -0.052693177 | 0.283459881 | 0.204657358 | 0.371562389 |
| Urine albumin | NCA | 0.191443203 | -0.044212826 | 0.396118466 | 0.067534481 | 0.182956542 |
| Urine albumin | CA | -0.079606775 | -0.310329998 | 0.164734346 | 0.450657265 | 0.628902302 |
| Urine albumin | GCDCA_3S | 0.185930558 | -0.071038082 | 0.37414376 | 0.07597923 | 0.186948894 |
| Urine albumin | CDCA_3Gln | 0.102211382 | -0.109180827 | 0.309865284 | 0.332288356 | 0.501112279 |
| Urine albumin | GCDCA_3Gln | 0.15791745 | -0.029668326 | 0.339307227 | 0.13272772 | 0.278877345 |
| Urine albumin | DHLCA | -0.346516226 | -0.530675756 | -0.134484616 | 0.000715162 | 0.00833806 |
| Urine albumin | LCA | -0.210185066 | -0.426847027 | 0.012906233 | 0.044327166 | 0.148021072 |
| Urine albumin | DCA | -0.270615984 | -0.439819455 | -0.045691085 | 0.00907961 | 0.042447177 |
| Urine albumin | 3DHCA | -0.048113576 | -0.224793101 | 0.15160362 | 0.64879032 | 0.780954208 |
| Urine albumin | GLCA | -0.323944205 | -0.519495256 | -0.11408096 | 0.001632238 | 0.011999158 |
| Urine albumin | TLCA | -0.415526065 | -0.563045796 | -0.250167436 | 3.80601E-05 | 0.001186207 |
| UACR | NCA | 0.252493103 | 0.046351576 | 0.462233425 | 0.015174036 | 0.06756059 |
| UACR | CA | -0.108700519 | -0.290885544 | 0.138895225 | 0.302342325 | 0.471150122 |
| UACR | GCDCA_3S | 0.213139136 | 0.036080695 | 0.387321273 | 0.041359242 | 0.143225524 |
| UACR | CDCA_3Gln | 0.121476241 | -0.08685094 | 0.31645394 | 0.248702757 | 0.426673538 |
| UACR | GCDCA_3Gln | 0.198434869 | 0.011354731 | 0.351774487 | 0.057933662 | 0.17359779 |
| UACR | DHLCA | -0.332427768 | -0.498945864 | -0.154563851 | 0.001205671 | 0.010248204 |
| UACR | LCA | -0.172330333 | -0.353847968 | 0.039191928 | 0.100455637 | 0.231916099 |
| UACR | DCA | -0.254509601 | -0.437521052 | -0.050744235 | 0.01435509 | 0.065473215 |
| UACR | 3DHCA | -0.057350813 | -0.23784024 | 0.143110757 | 0.587118963 | 0.736854001 |
| UACR | GLCA | -0.32929644 | -0.532505185 | -0.124655799 | 0.001349648 | 0.010973226 |
| UACR | TLCA | -0.374379131 | -0.553959657 | -0.18798178 | 0.000236483 | 0.003401722 |
